# Supplementary material
Source: Springer Nature journal article supplement (https://www.springermedizin.de/resource/supplementary/13006_2013_175_MOESM2_ESM.pdf/9628176)

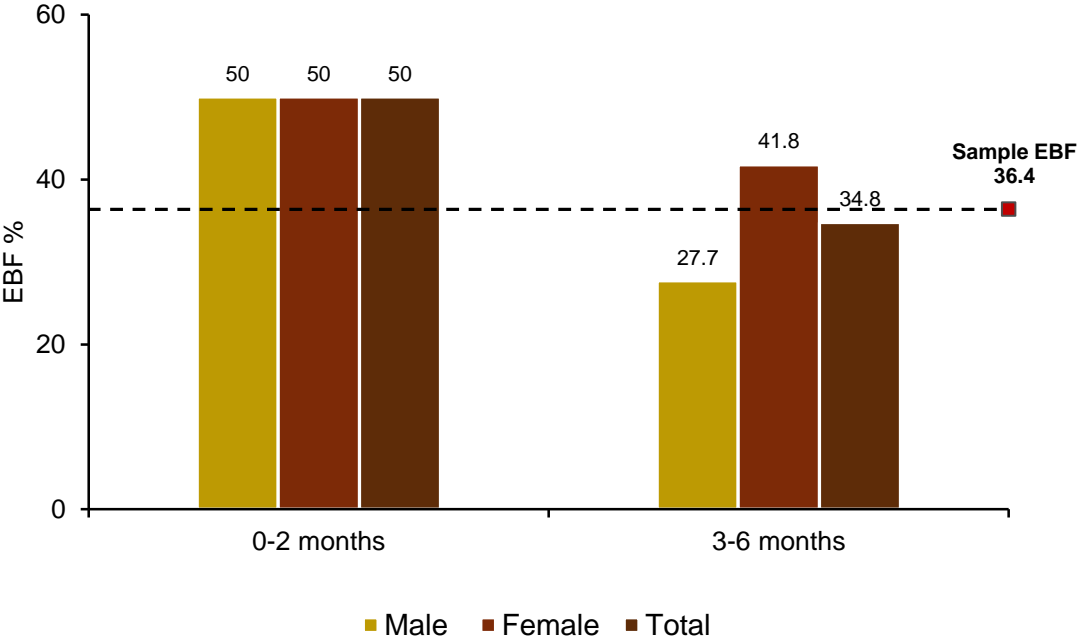

Supplement: MOESM2 [file 9628176]
